# Supplementary material for: Magnetic structure and properties of centrosymmetric twisted-melilite K2CoP2O7
Source: Royal Society of Chemistry journal article supplement (doi:10.1039/c7dt00978j), 2017-01-01
Supplement: c7dt00978j1.pdf [file c7dt00978j1.pdf]

## Supplementary Information

### Magnetic structure and properties of centrosymmetric twisted-melilite $K_2CoP_2O_7$

Matthew Sale<sup>†,‡</sup>, Maxim Avdeev<sup>†,‡\*</sup>, Zakiah Mohamed<sup>‡</sup>, Chris D. Ling<sup>‡</sup>, Prabeer Barpanda<sup>§</sup>

<sup>a, †</sup> Australian Centre for Neutron Scattering, Australian Nuclear Science and Technology Organization, Locked Bag 2001, Kirrawee DC NSW 2232, Australia

<sup>b, ‡</sup> School of Chemistry, The University of Sydney, Sydney NSW 2006, Australia

<sup>c, §</sup> Faraday Materials Laboratory, Materials Research Center, Indian Institute of Science, C.V. Raman Avenue, Bangalore, 560012, India

Table S1. Experimental and theoretical cell parameters and atomic coordinates. Thermal factors were included in the refinement in an overall isotropic form,  $B_{iso}$ , which converged to the value of  $0.30(4) \text{ \AA}^2$  for both 3 K and 20 K data sets.

|        | 3K         |           |            | 20K        |            |            | DFT       |           |            |
|--------|------------|-----------|------------|------------|------------|------------|-----------|-----------|------------|
| a, Å   | 7.8855(2)  |           |            | 7.8849(3)  |            |            | 8.0043    |           |            |
| c, Å   | 11.2378(4) |           |            | 11.2377(4) |            |            | 11.4784   |           |            |
| Volume | 698.78(4)  |           |            | 698.67(4)  |            |            | 735.43    |           |            |
|        | x          |           |            | y          |            |            | z         |           |            |
|        | NPD 3K     | NPD 20K   | DFT        | NPD 3K     | NPD 20K    | DFT        | NPD 3K    | NPD 20K   | DFT        |
| K1     | 0.3140(5)  | 0.3135(6) | 0.315241   | 0.3140(5)  | 0.3135(6)  | 0.315241   | 0         | 0         | 0          |
| K2     | 0.8534(6)  | 0.8530(6) | 0.84881    | -0.8534(6) | -0.8530(6) | -0.84881   | 0         | 0         | 0          |
| Co1    | 0.5        | 0.5       | 0.5        | 0          | 0          | 0          | 0.25      | 0.25      | 0.25       |
| P1     | 0.1369(3)  | 0.1369(3) | 0.136094   | 0.1369(3)  | 0.1369(3)  | 0.136094   | 0.2834(3) | 0.2835(3) | 0.282128   |
| O1     | 0          | 0         | 0          | 0          | 0          | 0          | 0.3351(5) | 0.3350(5) | 0.332604   |
| O2     | 0.1366(2)  | 0.1364(3) | 0.135858   | 0.1366(2)  | 0.1364(3)  | 0.135859   | 0.1518(3) | 0.1517(3) | 0.150717   |
| O3     | 0.3021(2)  | 0.3023(3) | 0.30099150 | 0.0791(2)  | 0.0782(2)  | 0.07827450 | 0.3434(2) | 0.3431(2) | 0.34034750 |

Table S2. Interatomic distances and angles for each super-super exchange pathway for the low temperature experimentally measured structure and DFT relaxed structure of anti-mellilite  $K_2CoP_2O_7$  and mellilite  $Sr_2CoGe_2O_7$ .  $J_1$  corresponds to the intralayer exchange.  $J_{2a}$  and  $J_{2b}$  correspond to interlayer via inequivalent K1 and K2 sites, respectively.

| Pathway                      | $K_2CoP_2O_7$ Experimental 3K |          |          | $K_2CoP_2O_7$ DFT Relaxed (U=4.5) |          |          | $Sr_2CoGe_2O_7$ Experimental 2.5K |          |          |
|------------------------------|-------------------------------|----------|----------|-----------------------------------|----------|----------|-----------------------------------|----------|----------|
|                              | $J_1$                         | $J_{2a}$ | $J_{2b}$ | $J_1$                             | $J_{2a}$ | $J_{2b}$ | $J_1$                             | $J_{2a}$ | $J_{2b}$ |
| Multiplicity (per unit cell) | 4                             | 4        | 4        | 4                                 | 4        | 4        | 4                                 | 4        | 4        |
| Multiplicity (per J pathway) | 1                             | 2        | 2        | 1                                 | 2        | 2        | 1                                 | 2        | 2        |
| Atom1                        | Co                            | Co       | Co       | Co                                | Co       | Co       | Co                                | Co       | Co       |
| Atom2                        | O                             | O        | O        | O                                 | O        | O        | O                                 | O        | O        |
| Atom3                        | P                             | K1       | K2       | P                                 | K1       | K2       | Ge                                | Sr       | Sr       |
| Atom4                        | O                             | O        | O        | O                                 | O        | O        | O                                 | O        | O        |
| Atom5                        | Co                            | Co       | Co       | Co                                | Co       | Co       | Co                                | Co       | Co       |
| Interatomic Distances        |                               |          |          |                                   |          |          |                                   |          |          |
| 1-2                          | 1.981                         | 1.981    | 1.981    | 2.001                             | 2.001    | 2.001    | 1.955                             | 1.955    | 1.955    |
| 2-3                          | 1.536                         | 2.882    | 2.818    | 1.550                             | 2.942    | 2.863    | 1.754                             | 2.857    | 2.559    |
| 3-4                          | 1.536                         | 2.882    | 2.818    | 1.550                             | 2.942    | 2.863    | 1.754                             | 2.559    | 2.857    |
| 4-5                          | 1.981                         | 1.981    | 1.981    | 2.001                             | 2.001    | 2.001    | 1.955                             | 1.955    | 1.955    |
| 1-3                          | 3.083                         | 4.022    | 4.123    | 3.132                             | 4.097    | 4.183    | 3.153                             | 4.066    | 4.017    |
| 2-4                          | 2.487                         | 3.520    | 3.520    | 2.521                             | 3.665    | 3.665    | 2.760                             | 3.833    | 3.833    |
| 3-5                          | 3.083                         | 4.022    | 4.123    | 3.132                             | 4.097    | 4.183    | 3.153                             | 4.017    | 4.066    |
| Angles                       |                               |          |          |                                   |          |          |                                   |          |          |
| 1-2-3                        | 121.926                       | 110.202  | 117.351  | 123.216                           | 110.512  | 117.524  | 116.342                           | 113.985  | 125.198  |
| 2-3-4                        | 108.096                       | 75.274   | 77.302   | 108.819                           | 77.049   | 79.612   | 103.775                           | 89.908   | 89.908   |
| 3-4-5                        | 121.926                       | 110.202  | 117.351  | 123.216                           | 110.512  | 117.524  | 116.342                           | 125.198  | 113.985  |
| 1-3-5                        | 129.465                       | 88.622   | 85.920   | 129.288                           | 88.909   | 86.640   | 132.467                           | 82.133   | 82.133   |

Table S3. Unit cell parameters of DFT relaxed structures of  $K_2CoP_2O_7$ , with U of 4.0, 4.2 and 4.5eV

| Structure type                               | U (eV) | a (Å)  | b (Å)  | c (Å)   | $\alpha$ | $\beta$ | $\gamma$ | Volume (Å <sup>3</sup> ) | Total Energy (K/FU) | Energy difference (K/FU) |
|----------------------------------------------|--------|--------|--------|---------|----------|---------|----------|--------------------------|---------------------|--------------------------|
| Experimental twisted-melilite-type structure | 4.0    | 8.0016 | 8.0018 | 11.4802 | 90       | 90      | 90       | 735.055                  | -907189.1           | 0                        |
|                                              | 4.3    | 8.0032 | 8.0034 | 11.4791 | 90       | 90      | 90       | 735.279                  | -906494.6           | 0                        |
|                                              | 4.5    | 8.0043 | 8.0044 | 11.4784 | 90       | 90      | 90       | 735.426                  | -906043.6           | 0                        |
| Hypothetical melilite-type structure         | 4.0    | 8.0585 | 8.0587 | 11.4081 | 90       | 90      | 90       | 740.852                  | -906801.9           | 387.2                    |
|                                              | 4.3    | 8.0603 | 8.0604 | 11.4064 | 90       | 90      | 90       | 741.064                  | -906108.7           | 386.0                    |
|                                              | 4.5    | 8.0614 | 8.0615 | 11.4055 | 90       | 90      | 90       | 741.210                  | -905659.6           | 384.0                    |

Table S4. Results of ionic relaxations of different configurations of a hypothetical  $K_2CoP_2O_7$  with a melilite structure ( $P4_21m$ ) – relaxed unit cell parameters and relative final energies for U = 4.5 eV.

| Magnetic configuration | G-type   | C-type   |
|------------------------|----------|----------|
| A (Å)                  | 8.0614   | 8.06141  |
| B                      | 8.06152  | 8.06153  |
| C                      | 11.40546 | 11.40546 |
| Volume Å <sup>3</sup>  | 741.2091 | 741.21   |
| Energy (K/FU)          | 0.0134   | 0        |

Table S5. Final relaxed positions of modified  $K_2CoP_2O_7$  with melilite structure relaxed in C- and G-type magnetic configurations.

| Atom | C-type   |          |          | G-type   |          |          |
|------|----------|----------|----------|----------|----------|----------|
|      | x        | y        | z        | x        | y        | z        |
| Co1  | 0.5      | 0        | 0.250007 | 0.5      | 0        | 0.250007 |
| Co2  | 0        | 0.5      | 0.249993 | 0        | 0.5      | 0.249993 |
| Co3  | 0.5      | 0        | 0.750007 | 0.5      | 0        | 0.750007 |
| Co4  | 0        | 0.5      | 0.749993 | 0        | 0.5      | 0.749993 |
| K1   | 0.664985 | 0.664989 | 0.005494 | 0.664986 | 0.66499  | 0.005494 |
| K2   | 0.664985 | 0.664989 | 0.505494 | 0.664986 | 0.664989 | 0.505494 |
| K3   | 0.835015 | 0.164989 | 0.994506 | 0.835014 | 0.164989 | 0.994506 |
| K4   | 0.835015 | 0.164989 | 0.494506 | 0.835014 | 0.164989 | 0.494506 |
| K5   | 0.164985 | 0.835011 | 0.994506 | 0.164986 | 0.835011 | 0.994506 |
| K6   | 0.164985 | 0.835011 | 0.494506 | 0.164986 | 0.835011 | 0.494506 |
| K7   | 0.335015 | 0.335011 | 0.005494 | 0.335014 | 0.335011 | 0.005494 |
| K8   | 0.335015 | 0.335011 | 0.505494 | 0.335014 | 0.335011 | 0.505494 |
| O1   | 0.5      | 0.5      | 0.321608 | 0.5      | 0.5      | 0.321608 |
| O2   | 0.5      | 0.5      | 0.821608 | 0.5      | 0.5      | 0.821608 |
| O3   | 0.577491 | 0.202275 | 0.33475  | 0.577491 | 0.202275 | 0.33475  |
| O4   | 0.577491 | 0.202275 | 0.83475  | 0.577491 | 0.202275 | 0.83475  |
| O5   | 0.638894 | 0.361118 | 0.141649 | 0.638893 | 0.361119 | 0.141649 |
| O6   | 0.638894 | 0.361118 | 0.641649 | 0.638893 | 0.361119 | 0.641649 |
| O7   | 0.702269 | 0.922514 | 0.165246 | 0.702269 | 0.922514 | 0.165246 |
| O8   | 0.702269 | 0.922515 | 0.665246 | 0.702269 | 0.922514 | 0.665246 |
| O9   | 0.797731 | 0.422515 | 0.334754 | 0.797731 | 0.422514 | 0.334754 |
| O10  | 0.797731 | 0.422515 | 0.834755 | 0.797731 | 0.422515 | 0.834754 |
| O11  | 0.861106 | 0.861118 | 0.358351 | 0.861107 | 0.861119 | 0.358351 |
| O12  | 0.861106 | 0.861118 | 0.858351 | 0.861107 | 0.861119 | 0.858351 |
| O13  | 0.922509 | 0.702274 | 0.16525  | 0.922509 | 0.702275 | 0.16525  |
| O14  | 0.922509 | 0.702274 | 0.66525  | 0.922509 | 0.702275 | 0.66525  |
| O15  | 0        | 0        | 0.178392 | 0        | 0        | 0.178392 |
| O16  | 0        | 0        | 0.678392 | 0        | 0        | 0.678392 |
| O17  | 0.077491 | 0.297725 | 0.16525  | 0.077491 | 0.297725 | 0.16525  |
| O18  | 0.077491 | 0.297725 | 0.66525  | 0.077491 | 0.297725 | 0.66525  |
| O19  | 0.138894 | 0.138882 | 0.358351 | 0.138893 | 0.138881 | 0.358351 |
| O20  | 0.138894 | 0.138882 | 0.858351 | 0.138893 | 0.138881 | 0.858351 |
| O21  | 0.202269 | 0.577485 | 0.334754 | 0.202269 | 0.577485 | 0.334754 |
| O22  | 0.202269 | 0.577486 | 0.834754 | 0.202269 | 0.577485 | 0.834754 |
| O23  | 0.297731 | 0.077485 | 0.165245 | 0.297731 | 0.077485 | 0.165246 |
| O24  | 0.297731 | 0.077486 | 0.665246 | 0.297731 | 0.077485 | 0.665246 |
| O25  | 0.361106 | 0.638882 | 0.141649 | 0.361107 | 0.638881 | 0.141649 |
| O26  | 0.361106 | 0.638882 | 0.641649 | 0.361107 | 0.638881 | 0.641649 |
| O27  | 0.422509 | 0.797726 | 0.334751 | 0.422509 | 0.797725 | 0.33475  |
| O28  | 0.422509 | 0.797726 | 0.83475  | 0.422509 | 0.797725 | 0.83475  |
| P1   | 0.635942 | 0.364064 | 0.273851 | 0.635942 | 0.364065 | 0.27385  |
| P2   | 0.635942 | 0.364064 | 0.773851 | 0.635942 | 0.364065 | 0.77385  |
| P3   | 0.864058 | 0.864064 | 0.226149 | 0.864058 | 0.864065 | 0.22615  |

|    |          |          |          |          |          |         |
|----|----------|----------|----------|----------|----------|---------|
| P4 | 0.864058 | 0.864064 | 0.726149 | 0.864058 | 0.864065 | 0.72615 |
| P5 | 0.135942 | 0.135936 | 0.226149 | 0.135942 | 0.135935 | 0.22615 |
| P6 | 0.135942 | 0.135936 | 0.726149 | 0.135942 | 0.135935 | 0.72615 |
| P7 | 0.364058 | 0.635936 | 0.273851 | 0.364058 | 0.635935 | 0.27385 |
| P8 | 0.364058 | 0.635936 | 0.773851 | 0.364058 | 0.635935 | 0.77385 |

Table S6. Non-null components of the basis vectors (BVs) for the  $4d(1/2,0,1/4)$  site of the  $P4_2/mnm$  (#136) space group and the propagation vector  $k=(0,0,0)$ . The irreducible representation providing the best agreement with experimental NPD data is highlighted in bold font.

| IR         | BV | Co1(1/2,0,1/4) |          |   | Co2(0,1/2,1/4) |           |    | Co3(0,1/2,-1/4) |           |    | Co4(1/2,0,3/4) |           |    |
|------------|----|----------------|----------|---|----------------|-----------|----|-----------------|-----------|----|----------------|-----------|----|
|            |    | x              | y        | z | x              | y         | z  | x               | y         | z  | x              | y         | z  |
| $\Gamma_1$ | 1  |                |          | 1 |                |           | -1 |                 |           | -1 |                |           | 1  |
| $\Gamma_4$ | 1  |                |          | 1 |                |           | -1 |                 |           | 1  |                |           | -1 |
| $\Gamma_6$ | 1  |                |          | 1 |                |           | 1  |                 |           | -1 |                |           | -1 |
| $\Gamma_7$ | 1  |                |          | 1 |                |           | 1  |                 |           | 1  |                |           | 1  |
| $\Gamma_8$ | 1  | <b>1</b>       |          |   | <b>-1</b>      |           |    | <b>1</b>        |           |    | <b>-1</b>      |           |    |
|            | 2  |                | <b>1</b> |   |                | <b>1</b>  |    |                 | <b>-1</b> |    |                | <b>-1</b> |    |
|            | 3  |                | <b>1</b> |   |                | <b>-1</b> |    |                 | <b>1</b>  |    |                | <b>-1</b> |    |
|            | 4  | <b>-1</b>      |          |   | <b>-1</b>      |           |    | <b>1</b>        |           |    | <b>1</b>       |           |    |
| $\Gamma_9$ | 1  | 1              |          |   | -1             |           |    | -1              |           |    | 1              |           |    |
|            | 2  |                | 1        |   |                | 1         |    |                 | 1         |    |                | 1         |    |
|            | 3  |                | -1       |   |                | 1         |    |                 | 1         |    |                | -1        |    |
|            | 4  | 1              |          |   | 1              |           |    | 1               |           |    | 1              |           |    |

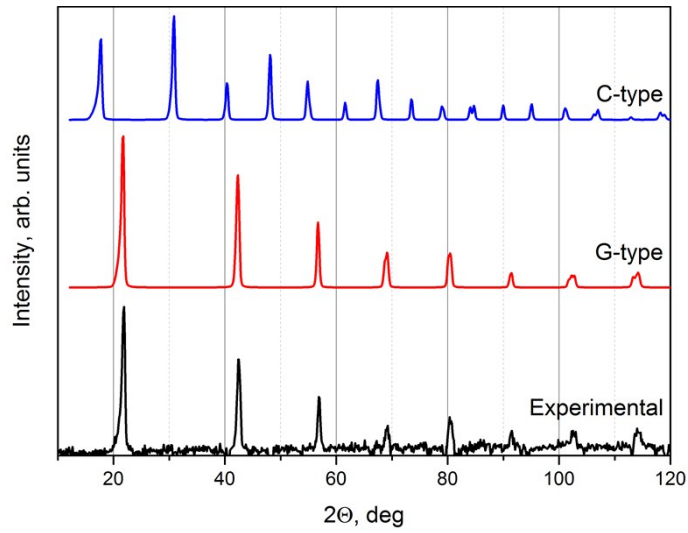

Figure S1. Bottom: purely magnetic diffraction signal (difference between NPD data collected at 20 K and 3 K); middle and top: simulated magnetic diffraction patterns for G-type and C-type models, respectively.

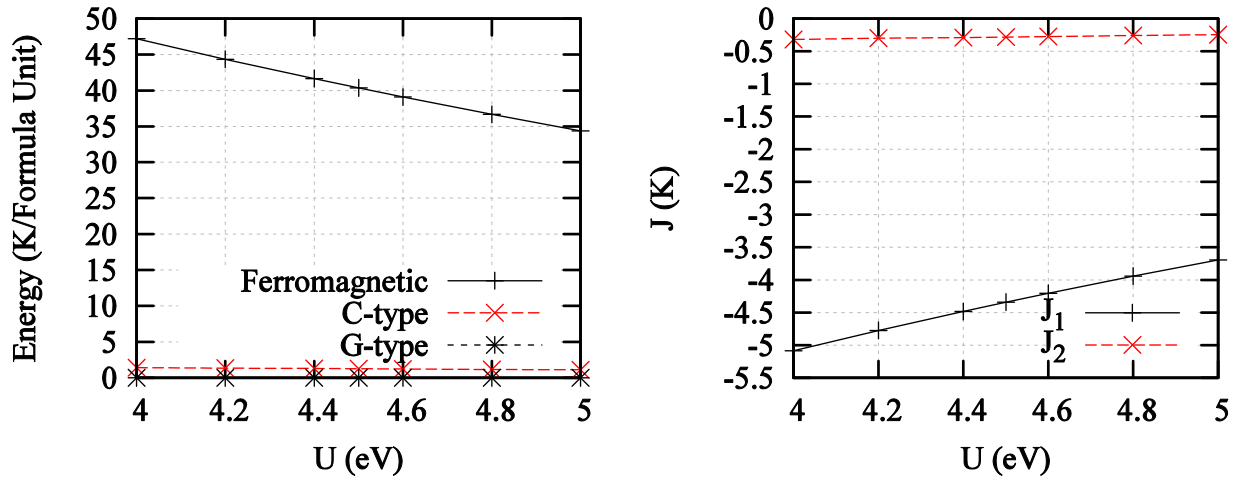

Figure S2. Total energy of considered magnetic configurations (left) and exchange parameters  $J_1$  and  $J_2$  (right) as a function of  $U$ .

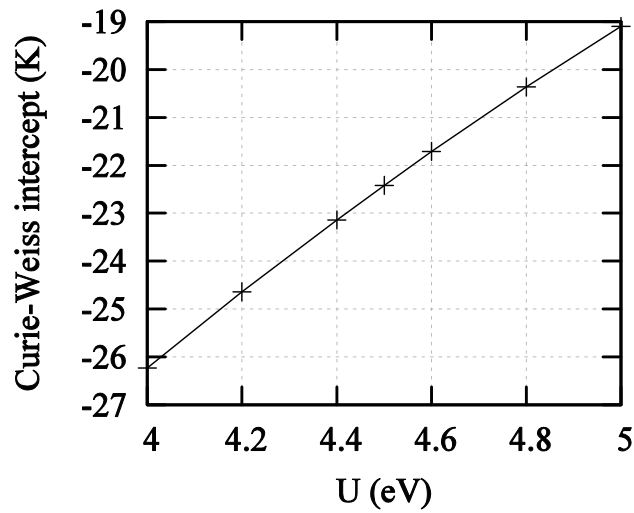

Figure S3. Calculated Curie-Weiss temperature as a function of  $U$  value.
